# Supplementary material for: siRNA-Encapsulated Hybrid Nanoparticles Target Mutant K-ras and Inhibit Metastatic Tumor Burden in a Mouse Model of Lung Cancer
Source: PubMed Central journal article supplement — Mol Ther Nucleic Acids. 2016 Dec 31;6:259–68. doi: 10.1016/j.omtn.2016.12.009 (PMC5363504; doi:10.1016/j.omtn.2016.12.009), 2016-12-31
Supplement: mmc1.pdf [file mmc1.pdf]

OMTN, Volume 6

## Supplemental Information

**siRNA-Encapsulated Hybrid Nanoparticles**

**Target Mutant *K-ras* and Inhibit Metastatic**

**Tumor Burden in a Mouse Model of Lung Cancer**

**Maryna Perepelyuk, Olubunmi Shoyele, Ruth Birbe, Chellappagounder Thangavel, Yi Liu, Robert B. Den, Adam E. Snook, Bo Lu, and Sunday A. Shoyele**

Supplementary Materials

*Supplementary figures*

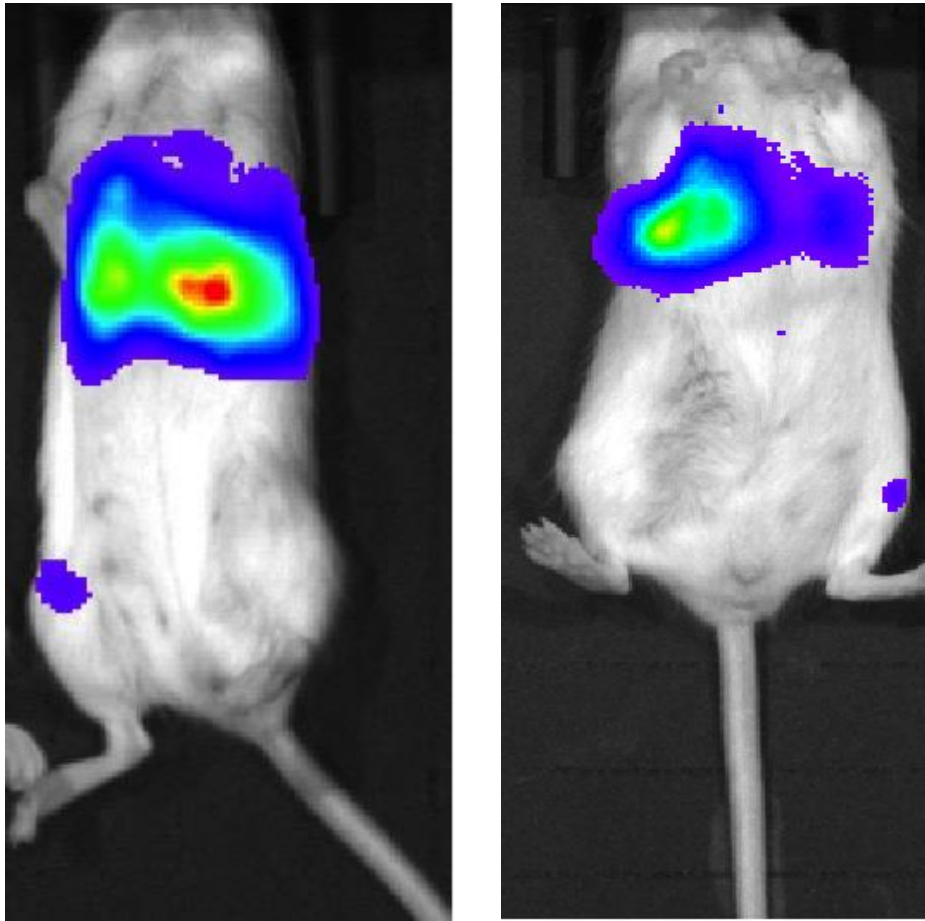

Fig. S1. PBS-treated mice showing tumor metastasis to either the right or left popliteal lymph nodes.

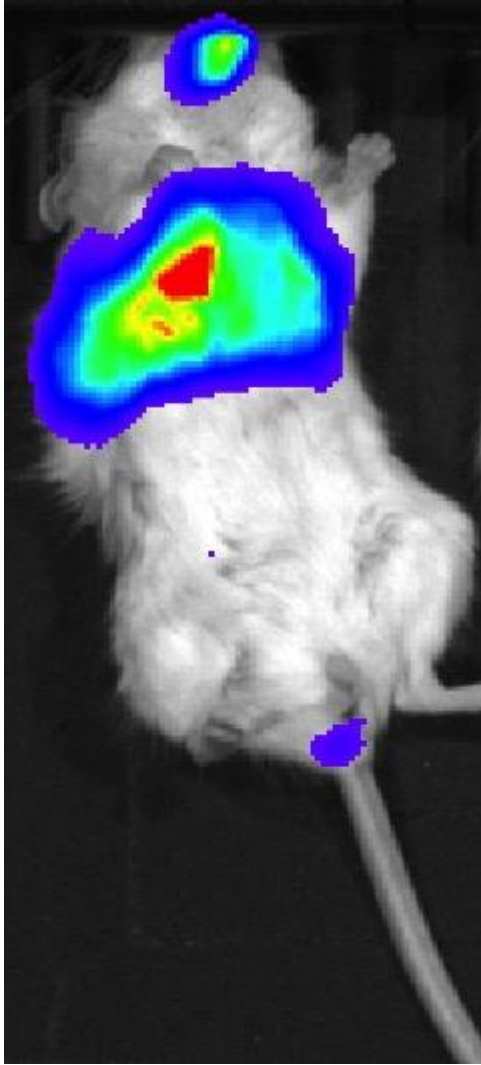

Fig. S2. A mice in the erlotinib treated group showing tumor metastasis in the brain after 4 weeks of treatment.

a

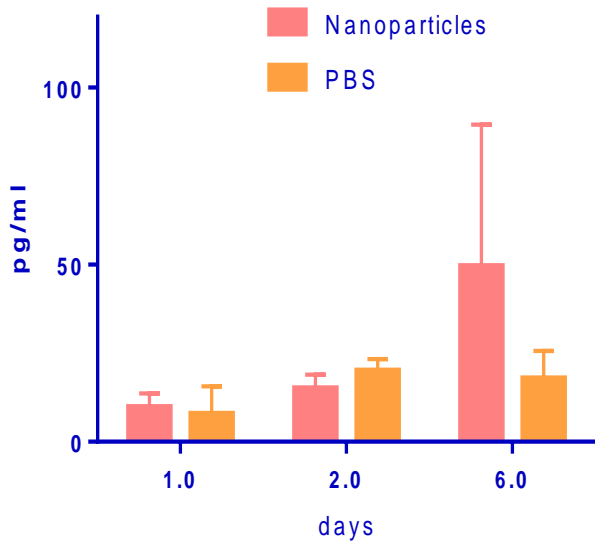

b

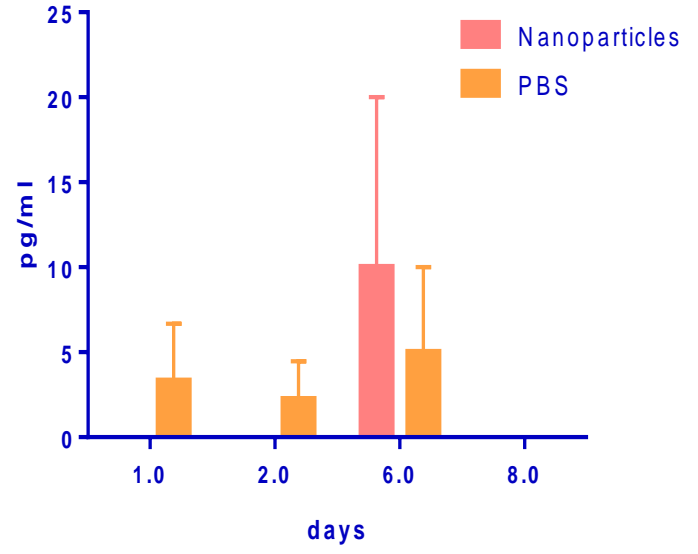

Fig. S3. Cytokine expression in the serum of treated BALB/c mice. a. IL-6 expression. b. TNF- $\alpha$  expression.
